# Supplementary material
Source: publisher site journal article supplement (https://www.dovepress.com/get_supplementary_file.php?f=454463.docx)
Supplement: Supplementary file 1 [file get_supplementary_file.php]

**Table S1. Thrombus resolution rates used in the model**

|  | NOAC | | VKA | |
| --- | --- | --- | --- | --- |
| 1-6 weeks | Base | 0.111925 | Base | 0.040030 |
| α | 27 | α | 20 |
| β | 26 | β | 72 |
| 6-12 weeks | Base | 0.039651 | Base | 0.023689 |
| α | 10 | α | 18 |
| β | 16 | β | 54 |
| 12-26 weeks | Base | 0.021886 | Base | 0.023627 |
| α | 7 | α | 25 |
| β | 9 | β | 29 |
| 26-52 weeks | Base | 0.004821 | Base | 0.006188 |
| α | 2 | α | 8 |
| β | 7 | β | 21 |

Notes:

1. The data presented in this table are derived from the E-DISSOLVE study1.
2. Resolution rates within this table were calculated using a beta distribution based on calculated baseline values for each cycle's resolution rate, which have been rounded to six decimal places.
3. In the PSA, the resolution rates were determined using the beta distribution values obtained from the specified α and β parameters.

**Table S2. Transition probabilities between health states used in the model**

|  | NOAC | | VKA | |
| --- | --- | --- | --- | --- |
| LVT to SE/stroke | Base | 0.004258 | Base | 0.005247 |
| α | 109 | α | 386 |
| β | 509 | β | 1428 |
| LVT to all case bleed*  (1-12 weeks) | Base | 0.001164 | Base | 0.001830 |
| α | 94 | α | 290 |
| β | 1704 | β | 3293 |
| Bleed to major bleed*  (1-12 weeks) | Base | 0.001838 | Base | 0.002323 |
| α | 46 | α | 175 |
| β | 525 | β | 1562 |
| TR to LVT# | Base | 0.048000 | Base | 0.048000 |
| Low value | 0.010000 | Low value | 0.010000 |
| High value | 0.135000 | High value | 0.135000 |
| SE/stroke to death# | Base | 0.622000 | Base | 0.622000 |
| Low value | 0.533000 | Low value | 0.533000 |
| High value | 0.707000 | High value | 0.707000 |
| Major bleed to death# | Base | 0.601000 | Base | 0.601000 |
| Low value | 0.523000 | Low value | 0.523000 |
| High value | 0.690000 | High value | 0.690000 |
| Minor bleed to TR# | Base | 0.571429 | Base | 0.571429 |
| Low value | 0.428571 | Low value | 0.428571 |
| High value | 0.714286 | High value | 0.714286 |

Notes:

1. The transition probabilities between health states presented in this table are sourced from publicly available meta-analyses2 and national-level studies on cardiovascular event mortality rates3.
2. The base values for each cycle's transition rate have been calculated and rounded to six decimal places.
3. Rates without a distribution have been assigned upper and lower limits based on the available data due to the lack of a specific distribution.
4. *According to the E-DISSOLVE study, the incidence rate of bleeding events approaches zero after 12 weeks; therefore, those rate for the first 12 weeks.
5. # Probabilities specific to those events are challenging to obtain. Based on expert consensus, these rates have a minimal impact on the final outcomes, hence a single value available has been used for both NOACs and VKAs. The DSA results also reflect that.

**Table S3. Utility Values for Health States**

| Health State | ICD-10 Code | Utility Value | | |
| --- | --- | --- | --- | --- |
| Base Value | Low value | High value |
| LVT | I23.6 | 0.011596 | 0.007000 | 0.015308 |
| TR | I74 | 0.014058 | 0.013288 | 0.019231 |
| SE/stroke | I63-I64 | 0.012327 | 0.009923 | 0.016308 |
| Major bleed | I65-68 | 0.011615 | 0.008327 | 0.015308 |
| CRNMB | D68.303 | 0.014173 | 0.013250 | 0.015308 |
| Death | - | 0 | 0 | 0 |

Notes:

1. The utility values presented in this table were derived from an EQ-5D-3L study4, which included values from both the UK and the US. For our analysis, we have selected the UK values.
2. The utility values in the referenced study were originally calculated on an annual basis. The values in this table have been converted to reflect a weekly basis to align with the time frame of our model.

**Table S4. DRG Payment Standards for Disease States**

| Disease State | ICD-10 Code | DRG Code* | Average (CNY) | Low value (CNY) | High value (CNY) |
| --- | --- | --- | --- | --- | --- |
| Average length of stay  (days) | Shortest length of stay  (days) | Longest length of stay  (days) |
| LVT | I23 | FR13 | 11429.00 | 7616.00 | 30699.00 |
| 8.44 | 5.76 | 12.67 |
| TR | I74 | FZ15 | 5631.00 | 2829.00 | 10753.00 |
| 5.71 | 2.29 | 9.00 |
| SE/stroke | I63-I64 | BR2 | 8859.00 | 6206.00 | 19656.00 |
| 9.25 | 6.91 | 13.35 |
| Major bleed | I65-68 | BR15 | 15979.00 | 5345.00 | 33677.00 |
| 12.76 | 8.35 | 18.31 |
| CRNMB | D68.303 | QT19 | 6068.00 | 1579.00 | 15624.00 |
| 7.12 | 4.76 | 10.26 |

Notes:

1. *DRG codes as defined by China's DRG policy, which correspond to the ICD-10 codes for different disease conditions. These codes can be found on the official government website.
2. The DRG payment standards are presented as average, upper limit, and lower limit, which correspond to the average length of hospital stay, the shortest average length of stay, and the longest length of stay, respectively.
3. Given that our model operates on a weekly cycle (7 days), which aligns closely with the average length of stay for these conditions, we have not converted the costs to a standard 7-day hospital stay rate.

**Table S5. Drug Prices**

| Drug | BND (CNY) | | | VBP (CNY) | | |
| --- | --- | --- | --- | --- | --- | --- |
| Base value | Low value | High value | Base value | Low value | High value |
| Rivaroxaban | 270.48 | 169.40 | 386.26 | 18.27 | 16.80 | 19.74 |
| Apixaban | 487.20 | 438.48 | 535.92 | 47.32 | 13.72 | 59.52 |
| Edoxaban | 175.28 | 126.77 | 448.00 | 104.30 | 93.87 | 114.73 |
| Dabigatran | 258.30 | 241.92 | 317.48 | 152.18 | 56.51 | 207.62 |
| Warfarin | - | - | - | 3.06 | 1.26 | 14.00 |

Notes:

1. All prices listed in this table are calculated based on the cost of a one-week course of treatment according to the dosing regimen.
2. The 'base value' in the table represents the typical market price for the predominant variety of each drug. This is reflective of the most commonly purchased options in the market.
3. The 'low value' and 'high value' indicate the lowest and highest prices available domestically for these typical varieties. For drugs with a single listed price, we have chosen to represent the lowest and highest prices as ±10% of the base value to provide a range for potential price variations.

**Table S6. Cost of INR Monitoring for Warfarin Therapy**

| One-time | Base value | Low value | High value |
| --- | --- | --- | --- |
| CNY | 35.00 | 16.00 | 80.00 |

**Notes:**

1. The cost of a single INR monitoring session for warfarin therapy is based on local pricing, ensuring representation of the current expenses.
2. The frequency of INR monitoring for the warfarin group was determined based on information from a Chinese study, indicating an average of 13 INR tests per year for individuals on warfarin5, equivalent to approximately 0.25 tests per week.

**Figure S1. Scatter plot for rivaroxaban (95.0%)**


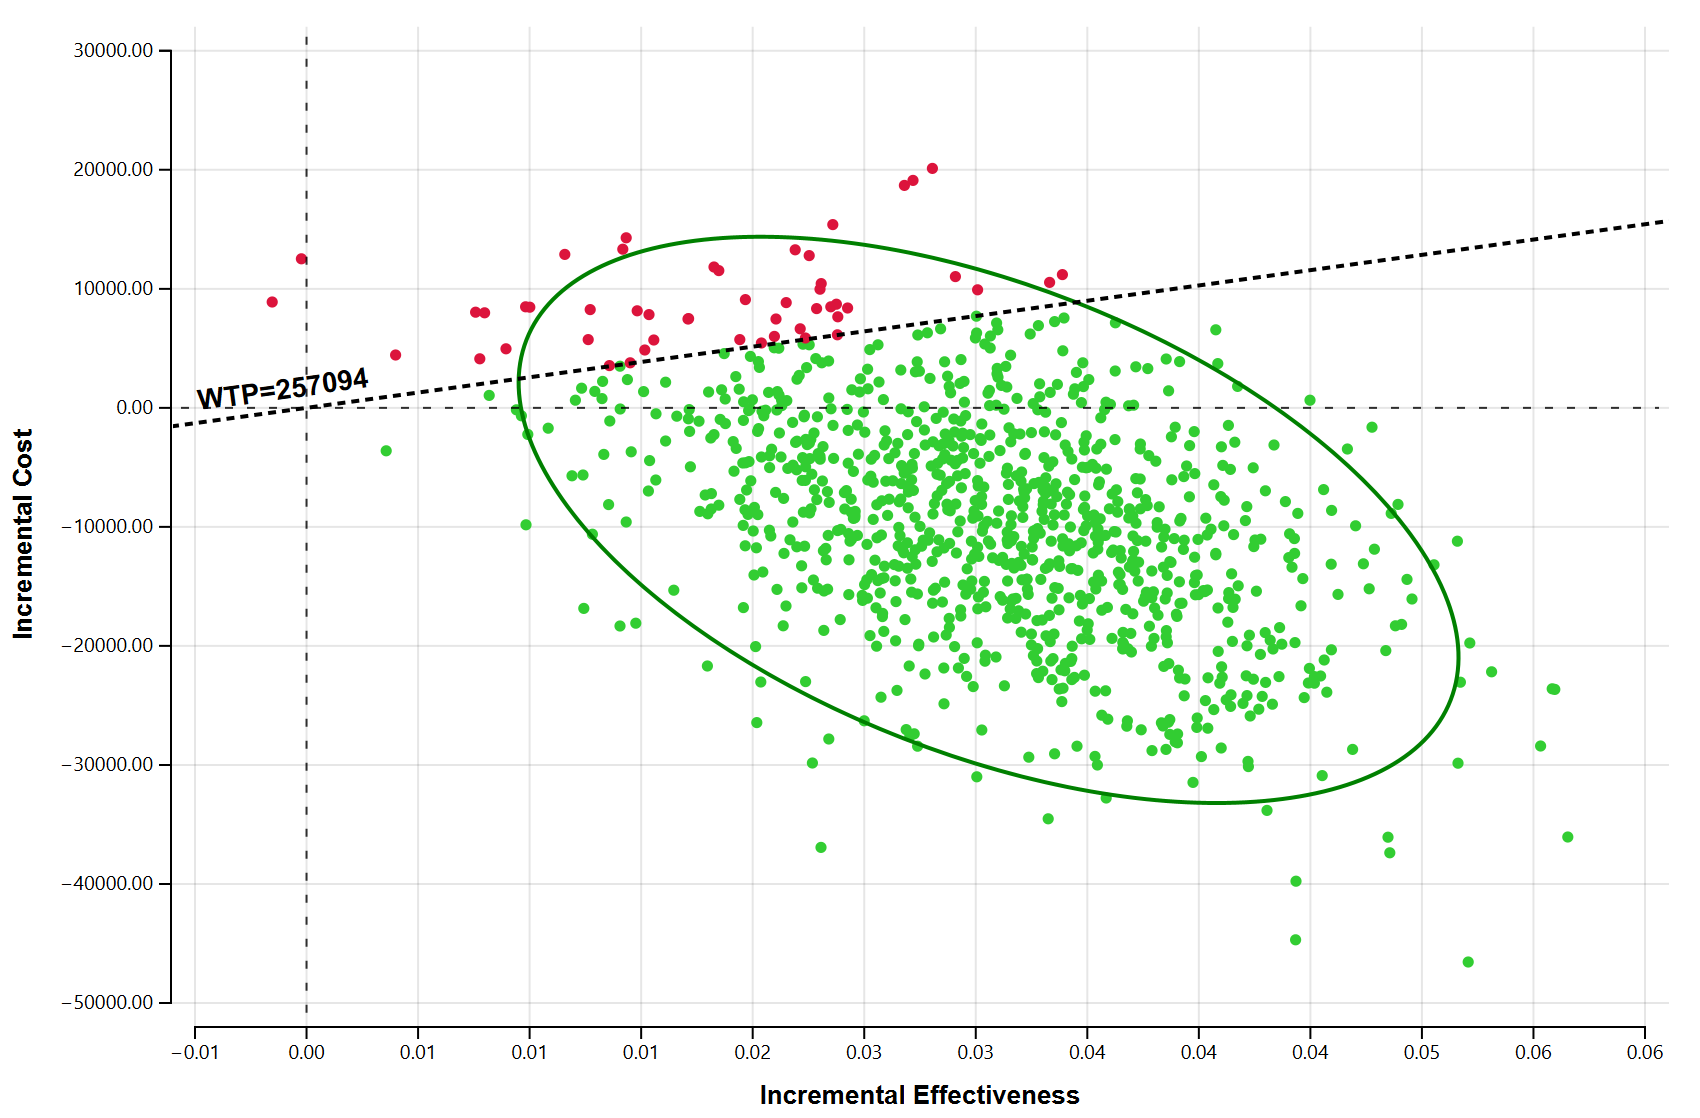


Abbreviations: WTP, Willingness-to-pay.

**Figure. S2 Scatter plot for apixaban (93.1%)**


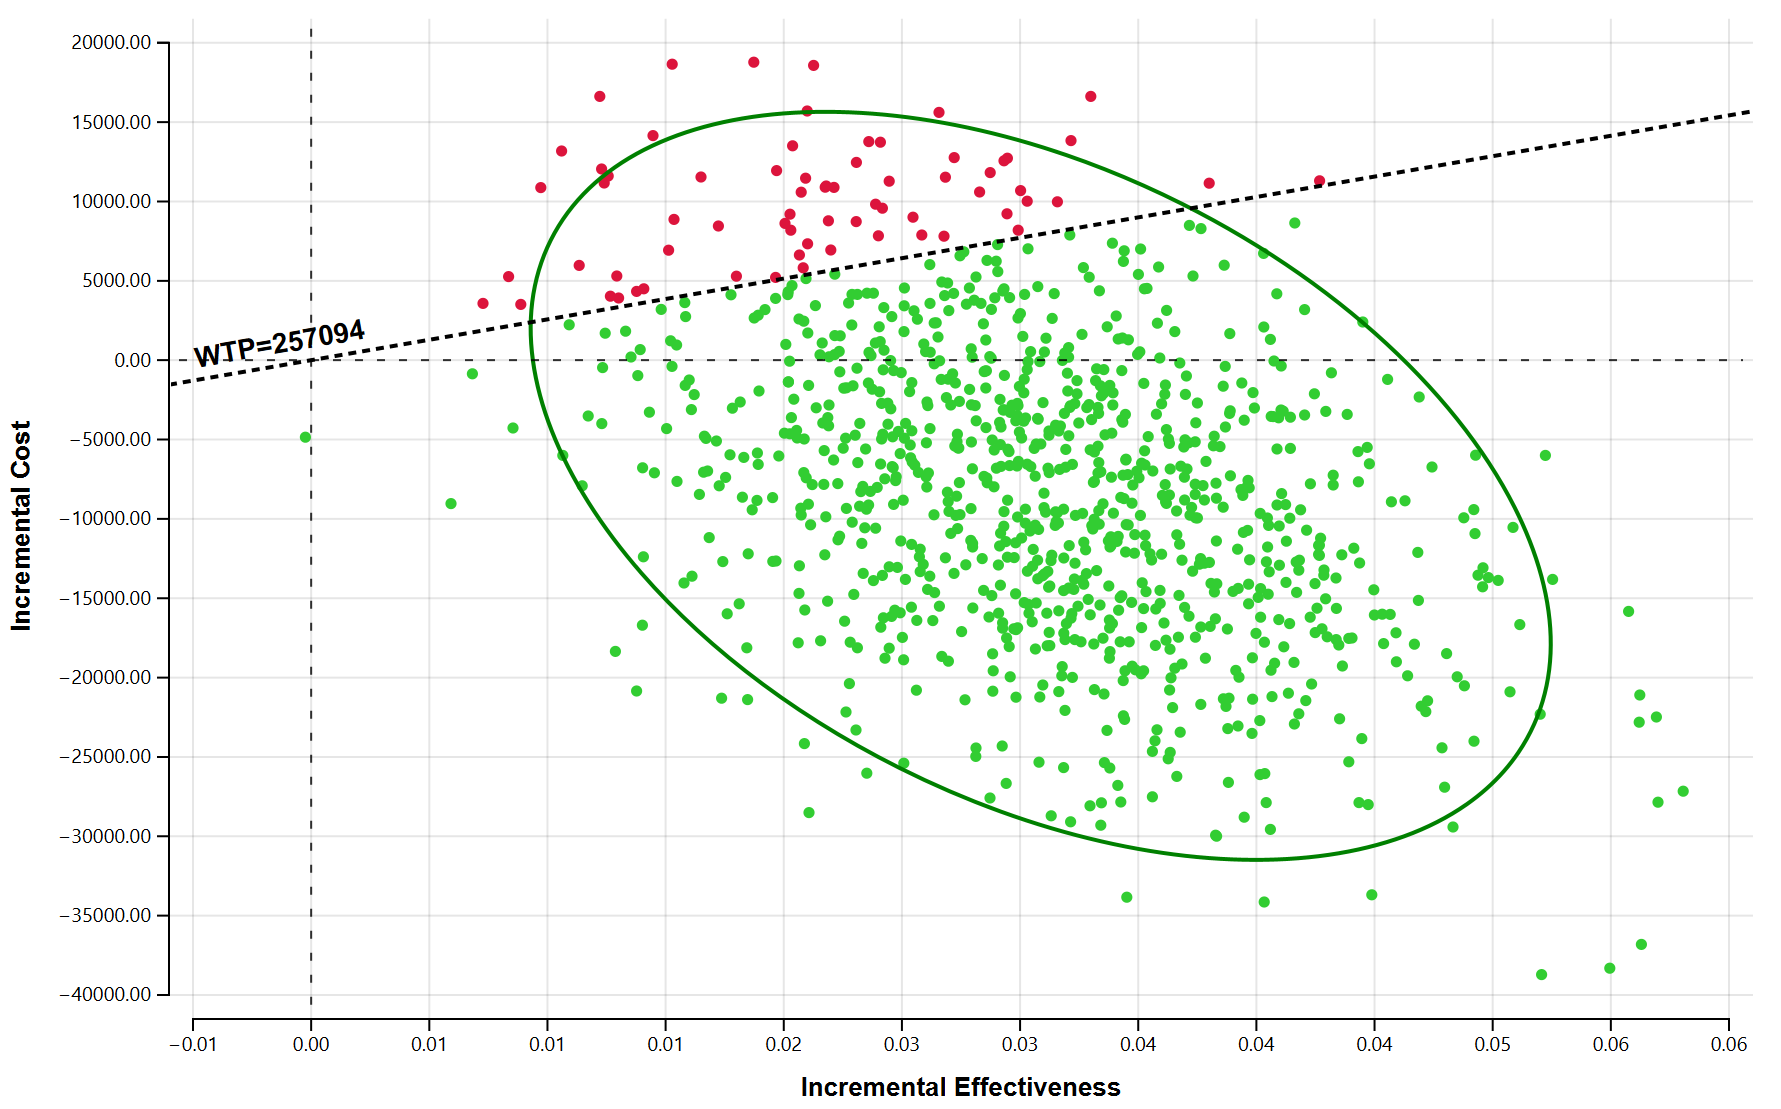


Abbreviations: WTP, Willingness-to-pay.

**Figure. S3 Scatter plot for edoxaban (89.1%)**


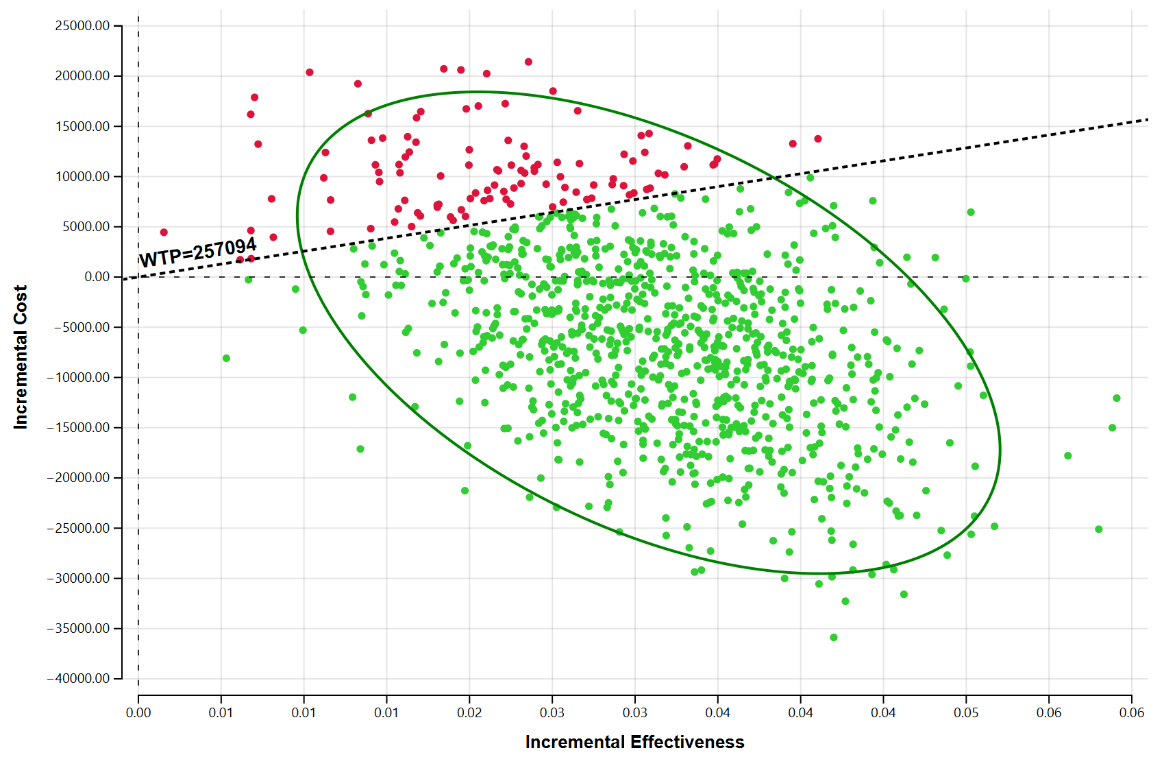


Abbreviations: WTP, Willingness-to-pay.

**Figure. S4 Scatter plot for dabigatran (82.5%)**


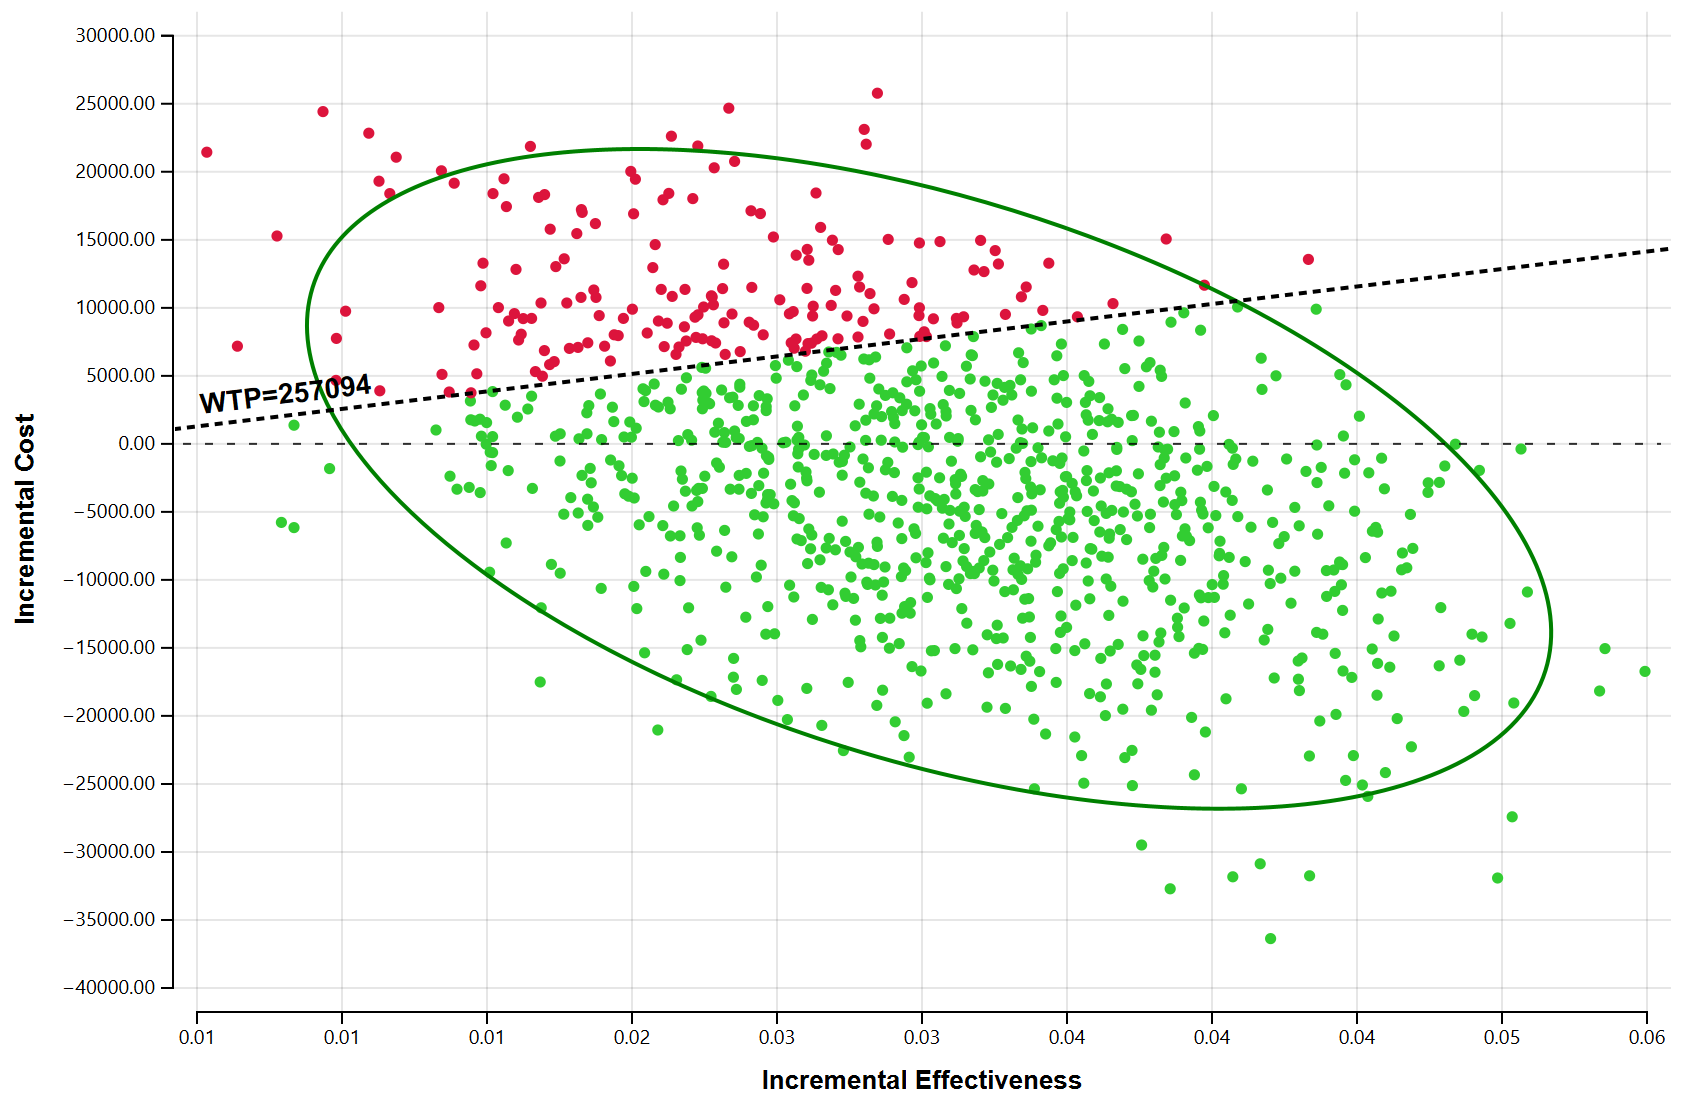


Abbreviations: WTP, Willingness-to-pay.

**References**

1. Yang Q, Lang X, Quan X, Gong Z, Liang Y. Different Oral Antithrombotic Therapy for the Treatment of Ventricular Thrombus: An Observational Study from 2010 to 2019. *International journal of clinical practice.* 2022;2022:7400860.

2. da Silva Ferreira H, Lima Lopes J, Augusto J, et al. Effect of direct oral anticoagulants versus vitamin K antagonists or warfarin in patients with left ventricular thrombus outcomes: A systematic review and meta-analysis. *Revista portuguesa de cardiologia : orgao oficial da Sociedade Portuguesa de Cardiologia = Portuguese journal of cardiology : an official journal of the Portuguese Society of Cardiology.* 2023;42(1):63-70.

3. Ma Q, Li R, Wang L, et al. Temporal trend and attributable risk factors of stroke burden in China, 1990-2019: an analysis for the Global Burden of Disease Study 2019. *The Lancet Public health.* 2021;6(12):e897-e906.

4. Falk Hvidberg M, Hernández Alava M. Catalogues of EQ-5D-3L Health-Related Quality of Life Scores for 199 Chronic Conditions and Health Risks for Use in the UK and the USA. *PharmacoEconomics.* 2023;41(10):1287-1388.

5. Huang Y, Lu X, Chen W, Meng X. Economic Evaluation of Oral Anticoagulation Therapies. Chinese Journal of Clinical Thoracic and Cardiovascular Surgery. 2016;23(09):859-863.
